# Supplementary material for: Mesocrystal TiO2 films: in situ topotactic transformation and application in dye-sensitised solar cells
Source: Royal Society of Chemistry journal article supplement (doi:10.1039/d1se01791h), 2021-12-17
Supplement: d1se01791h1.pdf [file d1se01791h1.pdf]

## Mesocrystal TiO<sub>2</sub> films: In-situ Topotactic Transformation and Application in Dye-Sensitised Solar Cells

Bingyu Lei,<sup>a</sup> Arivazhagan Valluvar Oli<sup>b</sup>, Aruna Ivaturi<sup>b</sup> and Neil Robertson <sup>\*a</sup>

### Supporting Information

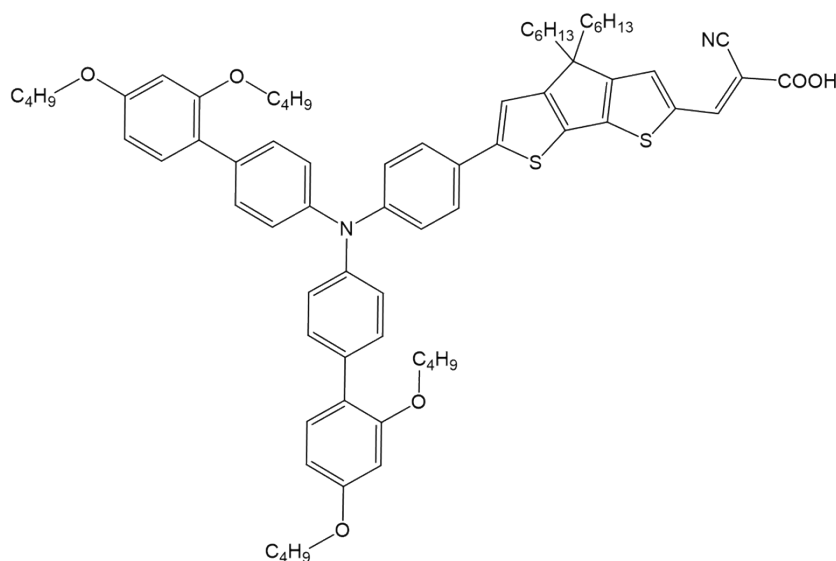

Figure S1: Molecular structure of LEG4.

Table S1: Comparison between NH<sub>4</sub>TiOF<sub>3</sub> paste and commercial TiO<sub>2</sub> pastes.

|                                | NH <sub>4</sub> TiOF <sub>3</sub> paste | Ti-Nanoxide T/SP | Ti-Nanoxide D/SP                  | Ti-Nanoxide R/SP |
|--------------------------------|-----------------------------------------|------------------|-----------------------------------|------------------|
| Abbreviation                   | F                                       | T                | D                                 | R                |
| TiO <sub>2</sub> particle size | 200~350 nm                              | 15-20 nm         | 15-20 nm +<br>diffusing particles | >100 nm          |
| TiO <sub>2</sub> concentration | /                                       | ~ 18 wt.%        | ~ 18 wt.%                         | ~ 18 wt.%        |
| Ti concentration               | ~ 10.8 wt.%                             | ~ 10.8 wt.%      | ~ 10.8 wt.%                       | ~ 10.8 wt.%      |

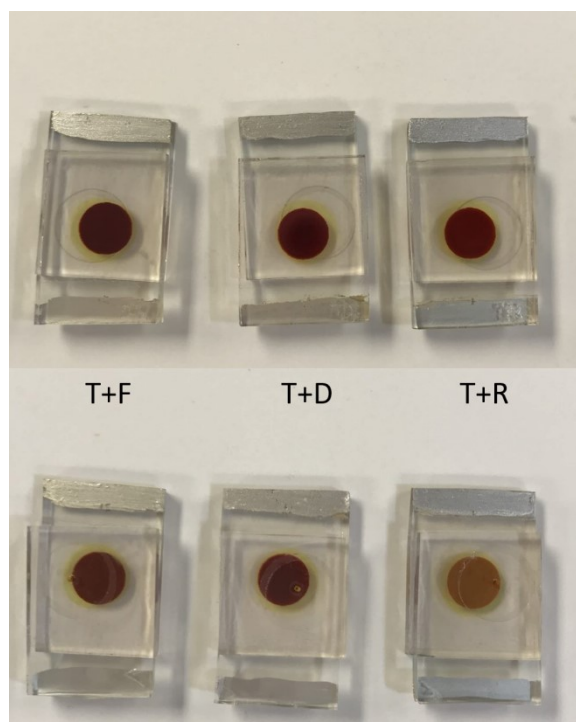

Figure S2 Digital pictures of the example DSSCs from working electrode side (top) and counter electrode side (down). T+F means the photoanode is composed with 1 layer of  $\text{TiO}_2$  made from commercial paste Ti-Nanoxide T/SP and 1 layer of  $\text{TiO}_2$  made from  $\text{NH}_4\text{TiOF}_3$  paste. D: Ti-Nanoxide D/SP; R: Ti-Nanoxide R/SP.

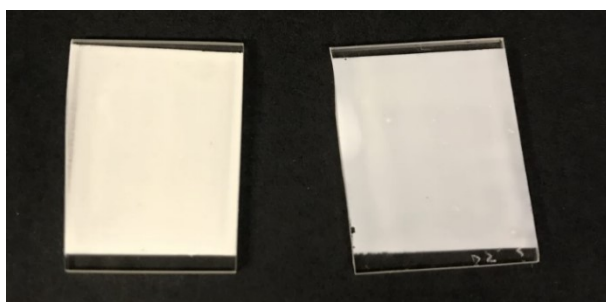

Figure S3 A digital photo of the doctor-bladed films from  $\text{NH}_4\text{TiOF}_3$  paste (left) or commercial paste Ti-Nanoxide D/SP (right), followed by a sintering process at at  $500\text{ }^\circ\text{C}$  for 2 hours with a heating rate of  $2\text{ }^\circ\text{C}/\text{min}$

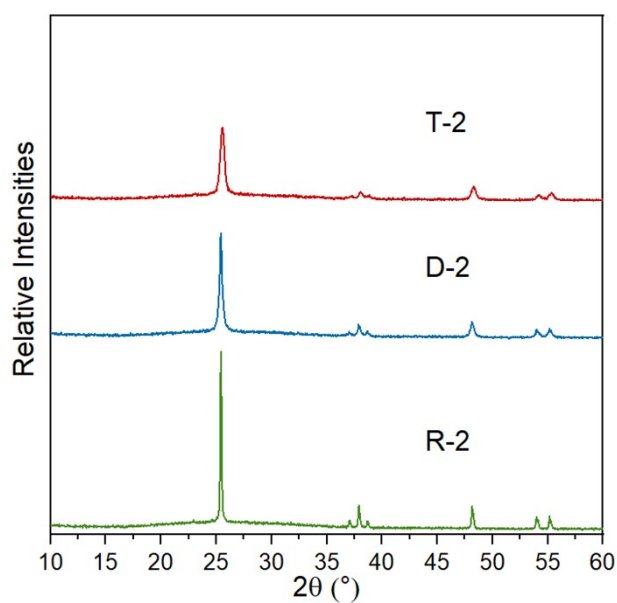

Figure S4: XRD patterns of  $\text{TiO}_2$  films from commercial available pastes (Ti-Nanoxide T/SP, Ti-Nanoxide D/SP, Ti-Nanoxide R/SP) sintered at 500 °C for 2 hours with a heating rate of 2 °C/min.

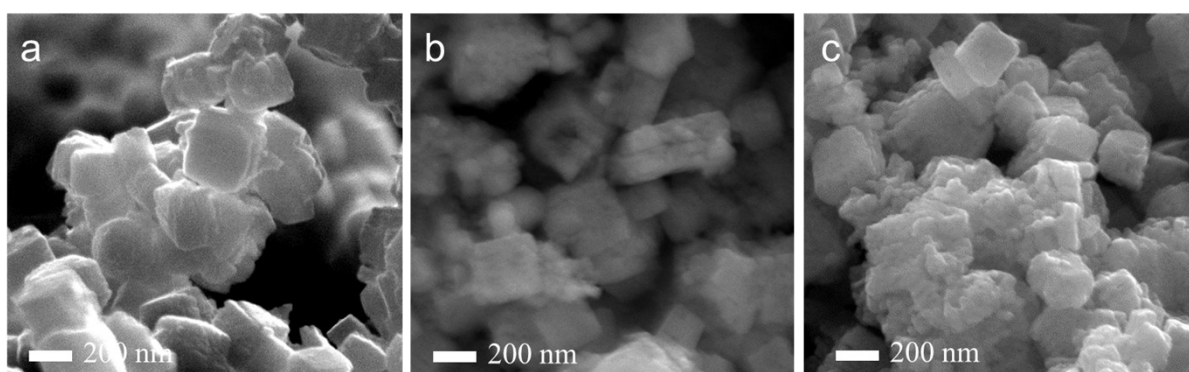

Figure S5: SEM images of  $\text{mcTiO}_2$  films from  $\text{NH}_4\text{TiOF}_3$  paste sintered at 500 °C for 2 hours with different heating rate, namely (a) 1 °C/min, (b) 5 °C/min, (c) 10 °C/min.

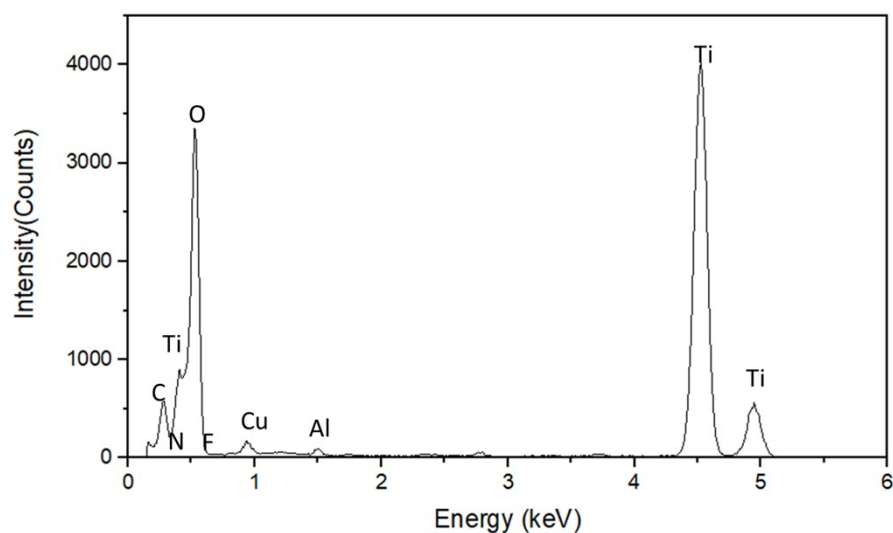

Figure S6: EDS spectrum of mcTiO<sub>2</sub> sintered at 500 °C for 2 hours with a heating rate of 2 °C/min.

Table S2: Elemental composition of mcTiO<sub>2</sub> from TEM-EDS analysis.

| Element | Atomic fraction (%) | Mass fraction (%) |
|---------|---------------------|-------------------|
| N       | 1.09                | 0.507             |
| O       | 54.5                | 28.9              |
| F       | 0.0147              | 0.00928           |
| Ti      | 44.4                | 70.6              |

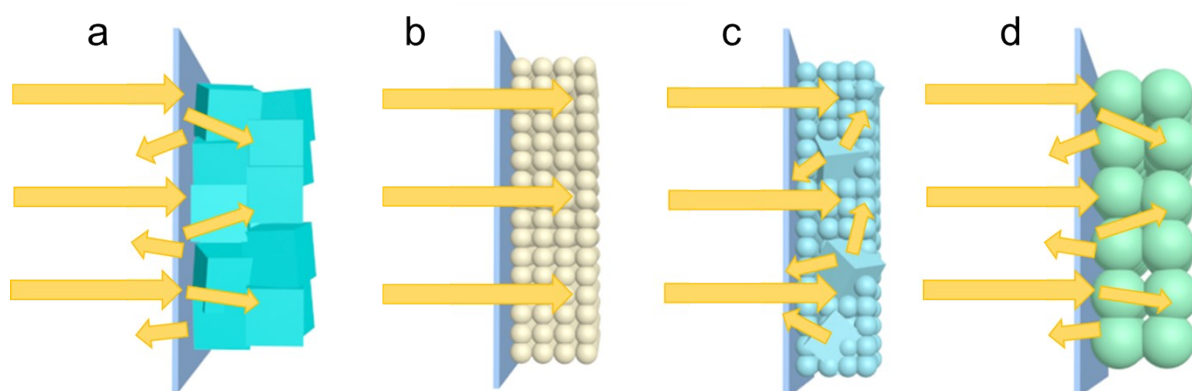

Figure S7: Schematic illustrations of the light path in DSSCs with different TiO<sub>2</sub> as photoanodes. (a) mesocrystal TiO<sub>2</sub> from NH<sub>4</sub>TiOF<sub>3</sub> paste, (b) transparent TiO<sub>2</sub> from Ti-Nanoxide T/SP, (c) diffractive TiO<sub>2</sub> from Ti-Nanoxide D/SP, (d) reflecting TiO<sub>2</sub> from Ti-Nanoxide R/SP.

Table S3: Comparison of some EIS parameters between different single-layer photoanodes.

| TiO <sub>2</sub> | R <sub>s</sub> (Ω)                                                                 | R <sub>pt</sub> (Ω) | R <sub>rec</sub> (Ω) | C <sub>μ</sub> (μF) | α                                         | β                                           |
|------------------|------------------------------------------------------------------------------------|---------------------|----------------------|---------------------|-------------------------------------------|---------------------------------------------|
|                  | Fitted parameters from Nyquist plot under -0.7 V bias under white LED illumination |                     |                      |                     | Extracted from lnC <sub>μ</sub> v.s. bias | Extracted from lnR <sub>rec</sub> v.s. bias |
| F                | 12.15                                                                              | 31.84               | 360.9                | 126.4               | 0.40                                      | 0.72                                        |
| T                | 13.22                                                                              | 44.65               | 244.0                | 192.2               | 0.26                                      | 0.66                                        |
| D                | 12.58                                                                              | 50.79               | 525.6                | 113.3               | 0.30                                      | 0.61                                        |
| R                | 12                                                                                 | 60.97               | 2166                 | 40.26               | 0.18                                      | 0.50                                        |

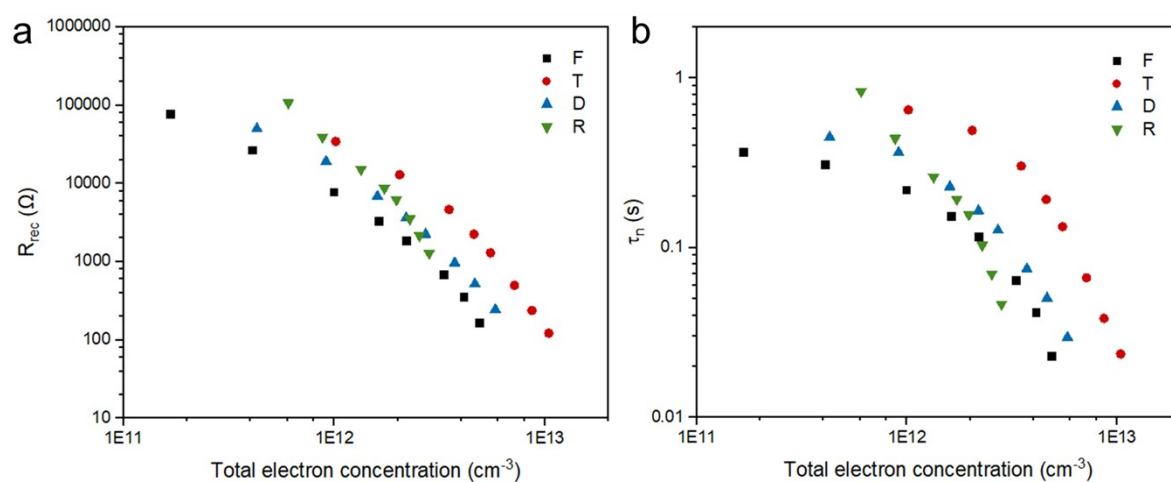

Figure S8: (a) Recombination resistance and (b) electron lifetime of single-layer photoanodes as a function of total electron concentration.

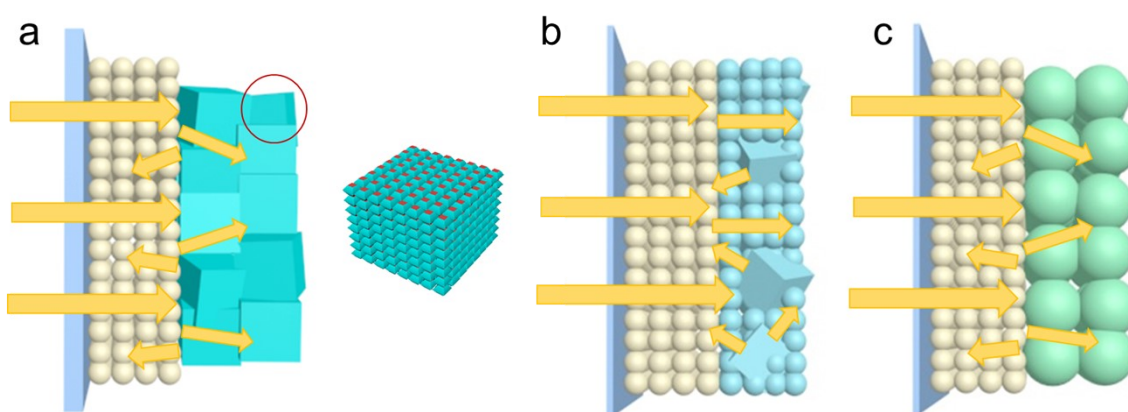

Figure S9: Schematic illustrations of the photoanodes with different scattering layer. (a) mesocrystal TiO<sub>2</sub>, (b) diffractive TiO<sub>2</sub>, (c) reflecting TiO<sub>2</sub>.

Table S4: Comparison of some EIS parameters between different two-layer photoanodes.

| TiO <sub>2</sub> | $\alpha$ | $\beta$ |
|------------------|----------|---------|
| T+F              | 0.31     | 0.69    |
| T+D              | 0.31     | 0.64    |
| T+R              | 0.29     | 0.64    |

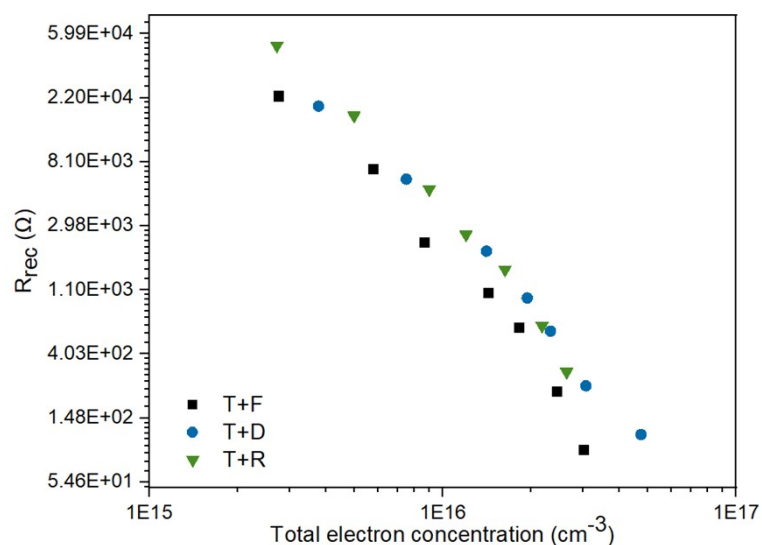

Figure S10: Recombination resistance of two-layer photoanodes as a function of total electron concentration.

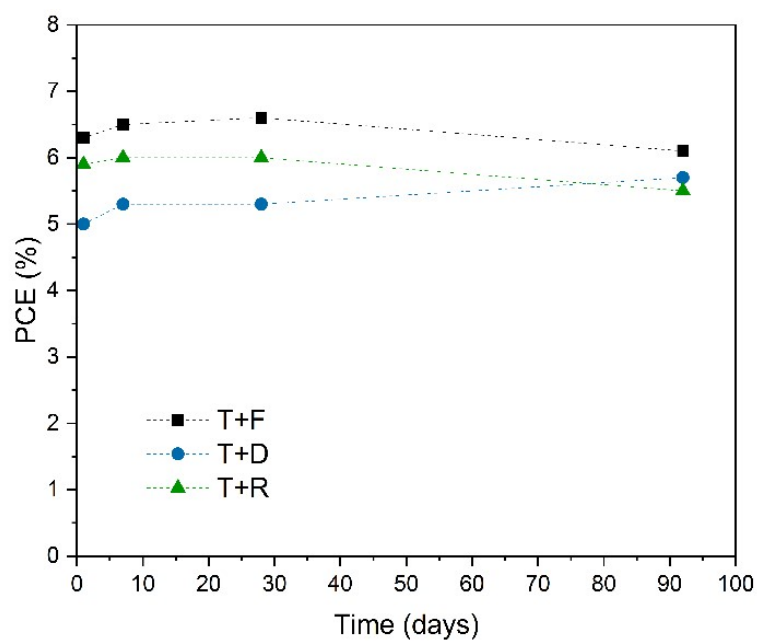

Figure S11 PCE records of DSSCs based on different photoanodes. Devices were kept in dark at the ambient condition.
